# Supplementary material
Source: MDPI journal article supplement (https://www.mdpi.com/2409-515X/5/1/9)
Supplement: s1 [file s1]

| Evaluation Criteria                                                                                                      | Weighting<br>Pass/Fail or<br>out of 10 | Pass Fail OR<br>Score (1-4 see<br>above) | Weighted Score<br>(Automatically<br>Calculated) | Comments |
|--------------------------------------------------------------------------------------------------------------------------|----------------------------------------|------------------------------------------|-------------------------------------------------|----------|
| <b>Desirable Functionalities (Scored)</b>                                                                                | 20%                                    |                                          |                                                 |          |
| <b>Phase 1</b>                                                                                                           |                                        |                                          |                                                 |          |
| General Business Requirements                                                                                            | 10                                     | 3.2                                      | 0.8                                             |          |
| Patient Record Business Requirements                                                                                     | 10                                     | 3.2                                      | 0.8                                             |          |
| Case Management Business Requirements                                                                                    | 10                                     | 3.5                                      | 0.9                                             |          |
| Clinical Medical Review Requirements                                                                                     | 10                                     | 2.5                                      | 0.6                                             |          |
| Total Raw Points                                                                                                         | 40                                     |                                          |                                                 |          |
| Overall Raw Score                                                                                                        |                                        |                                          | 3.1                                             |          |
| Section Points                                                                                                           | 20.0                                   |                                          | 15.4                                            |          |
| <b>Corporate Profile/Capability (Scored)</b>                                                                             | 10%                                    |                                          |                                                 |          |
| Financial and Corporate Viability of the Vendor:                                                                         | 5                                      | 1.8                                      | 0.3                                             |          |
| Previous experience of the respondent:                                                                                   | 10                                     | 2.3                                      | 0.8                                             |          |
| Quality of references provided by the respondent:                                                                        | 5                                      | 2.3                                      | 0.4                                             |          |
| Quality of the respondent's proposal                                                                                     | 5                                      | 2.8                                      | 0.5                                             |          |
| Value-adds in the respondent's proposal.                                                                                 | 5                                      | 2.8                                      | 0.5                                             |          |
| Total Raw Points                                                                                                         | 30                                     |                                          | 17.5                                            |          |
| Overall Raw Score                                                                                                        |                                        |                                          | 2.3                                             |          |
| Section Points                                                                                                           | 10.0                                   |                                          | 5.8                                             |          |
| <b>Technical Evaluation (Scored)</b>                                                                                     | 20%                                    |                                          |                                                 |          |
| Technical Architecture                                                                                                   | 10                                     | 2.5                                      | 0.3                                             |          |
| Understanding of Scope                                                                                                   | 10                                     | 2.5                                      | 0.3                                             |          |
| System Capabilities                                                                                                      | 10                                     | 2.3                                      | 0.3                                             |          |
| Integration capabilities                                                                                                 | 5                                      | 2.3                                      | 0.1                                             |          |
| User Interface                                                                                                           | 5                                      | 2.5                                      | 0.2                                             |          |
| Fit with existing technology and infrastructure                                                                          | 10                                     | 2.5                                      | 0.3                                             |          |
| Capability for ongoing changes and enhancements while maintaining current production environment i.e. Test/QA/Production | 5                                      | 3.0                                      | 0.2                                             |          |
| Legacy Data Support                                                                                                      | 5                                      | 3.0                                      | 0.2                                             |          |
| Proven design                                                                                                            | 3                                      | 2.8                                      | 0.1                                             |          |
| Uptime performance                                                                                                       | 3                                      | 2.5                                      | 0.1                                             |          |
| System response time                                                                                                     | 3                                      | 2.5                                      | 0.1                                             |          |
| Ability to support or transition to support                                                                              | 3                                      | 2.3                                      | 0.1                                             |          |
| Data loss prevention/integrity                                                                                           | 3                                      | 2.0                                      | 0.1                                             |          |
| User and system control including: Accountability, access, data integrity controls, auditability and privacy controls    | 3                                      | 2.3                                      | 0.1                                             |          |
| Total Raw Points                                                                                                         | 78                                     |                                          | 48.5                                            |          |
| Overall Raw Score                                                                                                        |                                        |                                          | 2.5                                             |          |
| Section Points                                                                                                           | 20.0                                   |                                          | 12.4                                            |          |
| <b>Implementation and Project Management (Scored)</b>                                                                    | 20%                                    |                                          |                                                 |          |
| Project Plan                                                                                                             | 10                                     | 2.5                                      | 0.4                                             |          |
| Implementation approach and design                                                                                       | 10                                     | 2.5                                      | 0.4                                             |          |
| Proposed team, strength and experience                                                                                   | 10                                     | 3.0                                      | 0.5                                             |          |
| Ability to meet Delivery Schedule                                                                                        | 10                                     | 2.3                                      | 0.3                                             |          |
| Strength of plan                                                                                                         | 5                                      | 2.8                                      | 0.2                                             |          |
| Quality control                                                                                                          | 10                                     | 2.8                                      | 0.4                                             |          |
| System Verification                                                                                                      | 5                                      | 2.8                                      | 0.2                                             |          |
| Enhancement plan                                                                                                         | 5                                      | 2.3                                      | 0.2                                             |          |
| Total Raw Points                                                                                                         | 65                                     |                                          | 2.6                                             |          |
| Overall Raw Score                                                                                                        |                                        |                                          | 2.6                                             |          |
| Maximum Section Points                                                                                                   | 20.0                                   |                                          | 13.0                                            |          |
| <b>Training and Technical Support (Scored)</b>                                                                           | 10%                                    |                                          |                                                 |          |
| Training Plan                                                                                                            | 5                                      | 3.4                                      | 0.6                                             |          |
| Support service model                                                                                                    | 5                                      | 2.3                                      | 0.4                                             |          |
| Support license agreement                                                                                                | 5                                      | 2.8                                      | 0.5                                             |          |
| Support communication and ticketing                                                                                      | 5                                      | 2.8                                      | 0.5                                             |          |
| Customization service model                                                                                              | 10                                     | 3.6                                      | 1.2                                             |          |
| Total Raw Points                                                                                                         | 30                                     |                                          | 3.1                                             |          |
| Overall Raw Score                                                                                                        |                                        |                                          | 7.7                                             |          |
| Section Points                                                                                                           | 10.0                                   |                                          |                                                 |          |
| <b>Financial Evaluation (Scored)</b>                                                                                     | 20%                                    |                                          |                                                 |          |
| <b>COMPLETED BY PROCURMENT OFFICER</b>                                                                                   |                                        |                                          | 18.0                                            |          |
|                                                                                                                          |                                        |                                          |                                                 |          |
| Total Percentage                                                                                                         | 100%                                   |                                          | 72.4                                            |          |
