# Supplementary material
Source: MDPI journal article supplement (https://www.mdpi.com/2409-515X/5/1/9)
Supplement: s1 [file s1]

## Configurability

-  Manual Workflows Removed
-  Control of rules and disease identification
-  Control of Workflows
-  Greater ability to control configuration

## Program Benefits

-  Cost Savings
-  Flexibility to undertake on new types of programs
-  Case Management flexibility
-  Other key functions (financial, card/kit mgmt, communications)

## New Equipment and Processes

-  Ability to use preferred analyzers
-  Ability to implement new lab tests and procedures
-  Support all NSO functions (screening, diagnostics, research)
-  Ability to handle new paradigms e.g. POC (CCHD), Consenting (IHP)

## Data and Reporting

-  External Reporting Flexibility (eg. BORN, OLIS, others)
-  Access to and understanding of Data (for Data Warehouse etc)
-  Native Analytics Capabilities
-  Ability to report on key Quality Metrics

## Legend:

### Arrow direction

-  Benefit on track to be achieved
-  Unclear whether full benefit will be achieved or not enough data
-  Benefit not currently on track to be achieved

### Arrow colour (area of impact)

-  All of NSO
-  Data/Admin function
-  Lab function
-  Follow-up function
