# Supplementary material
Source: MDPI journal article supplement (https://www.mdpi.com/2409-515X/5/1/9)

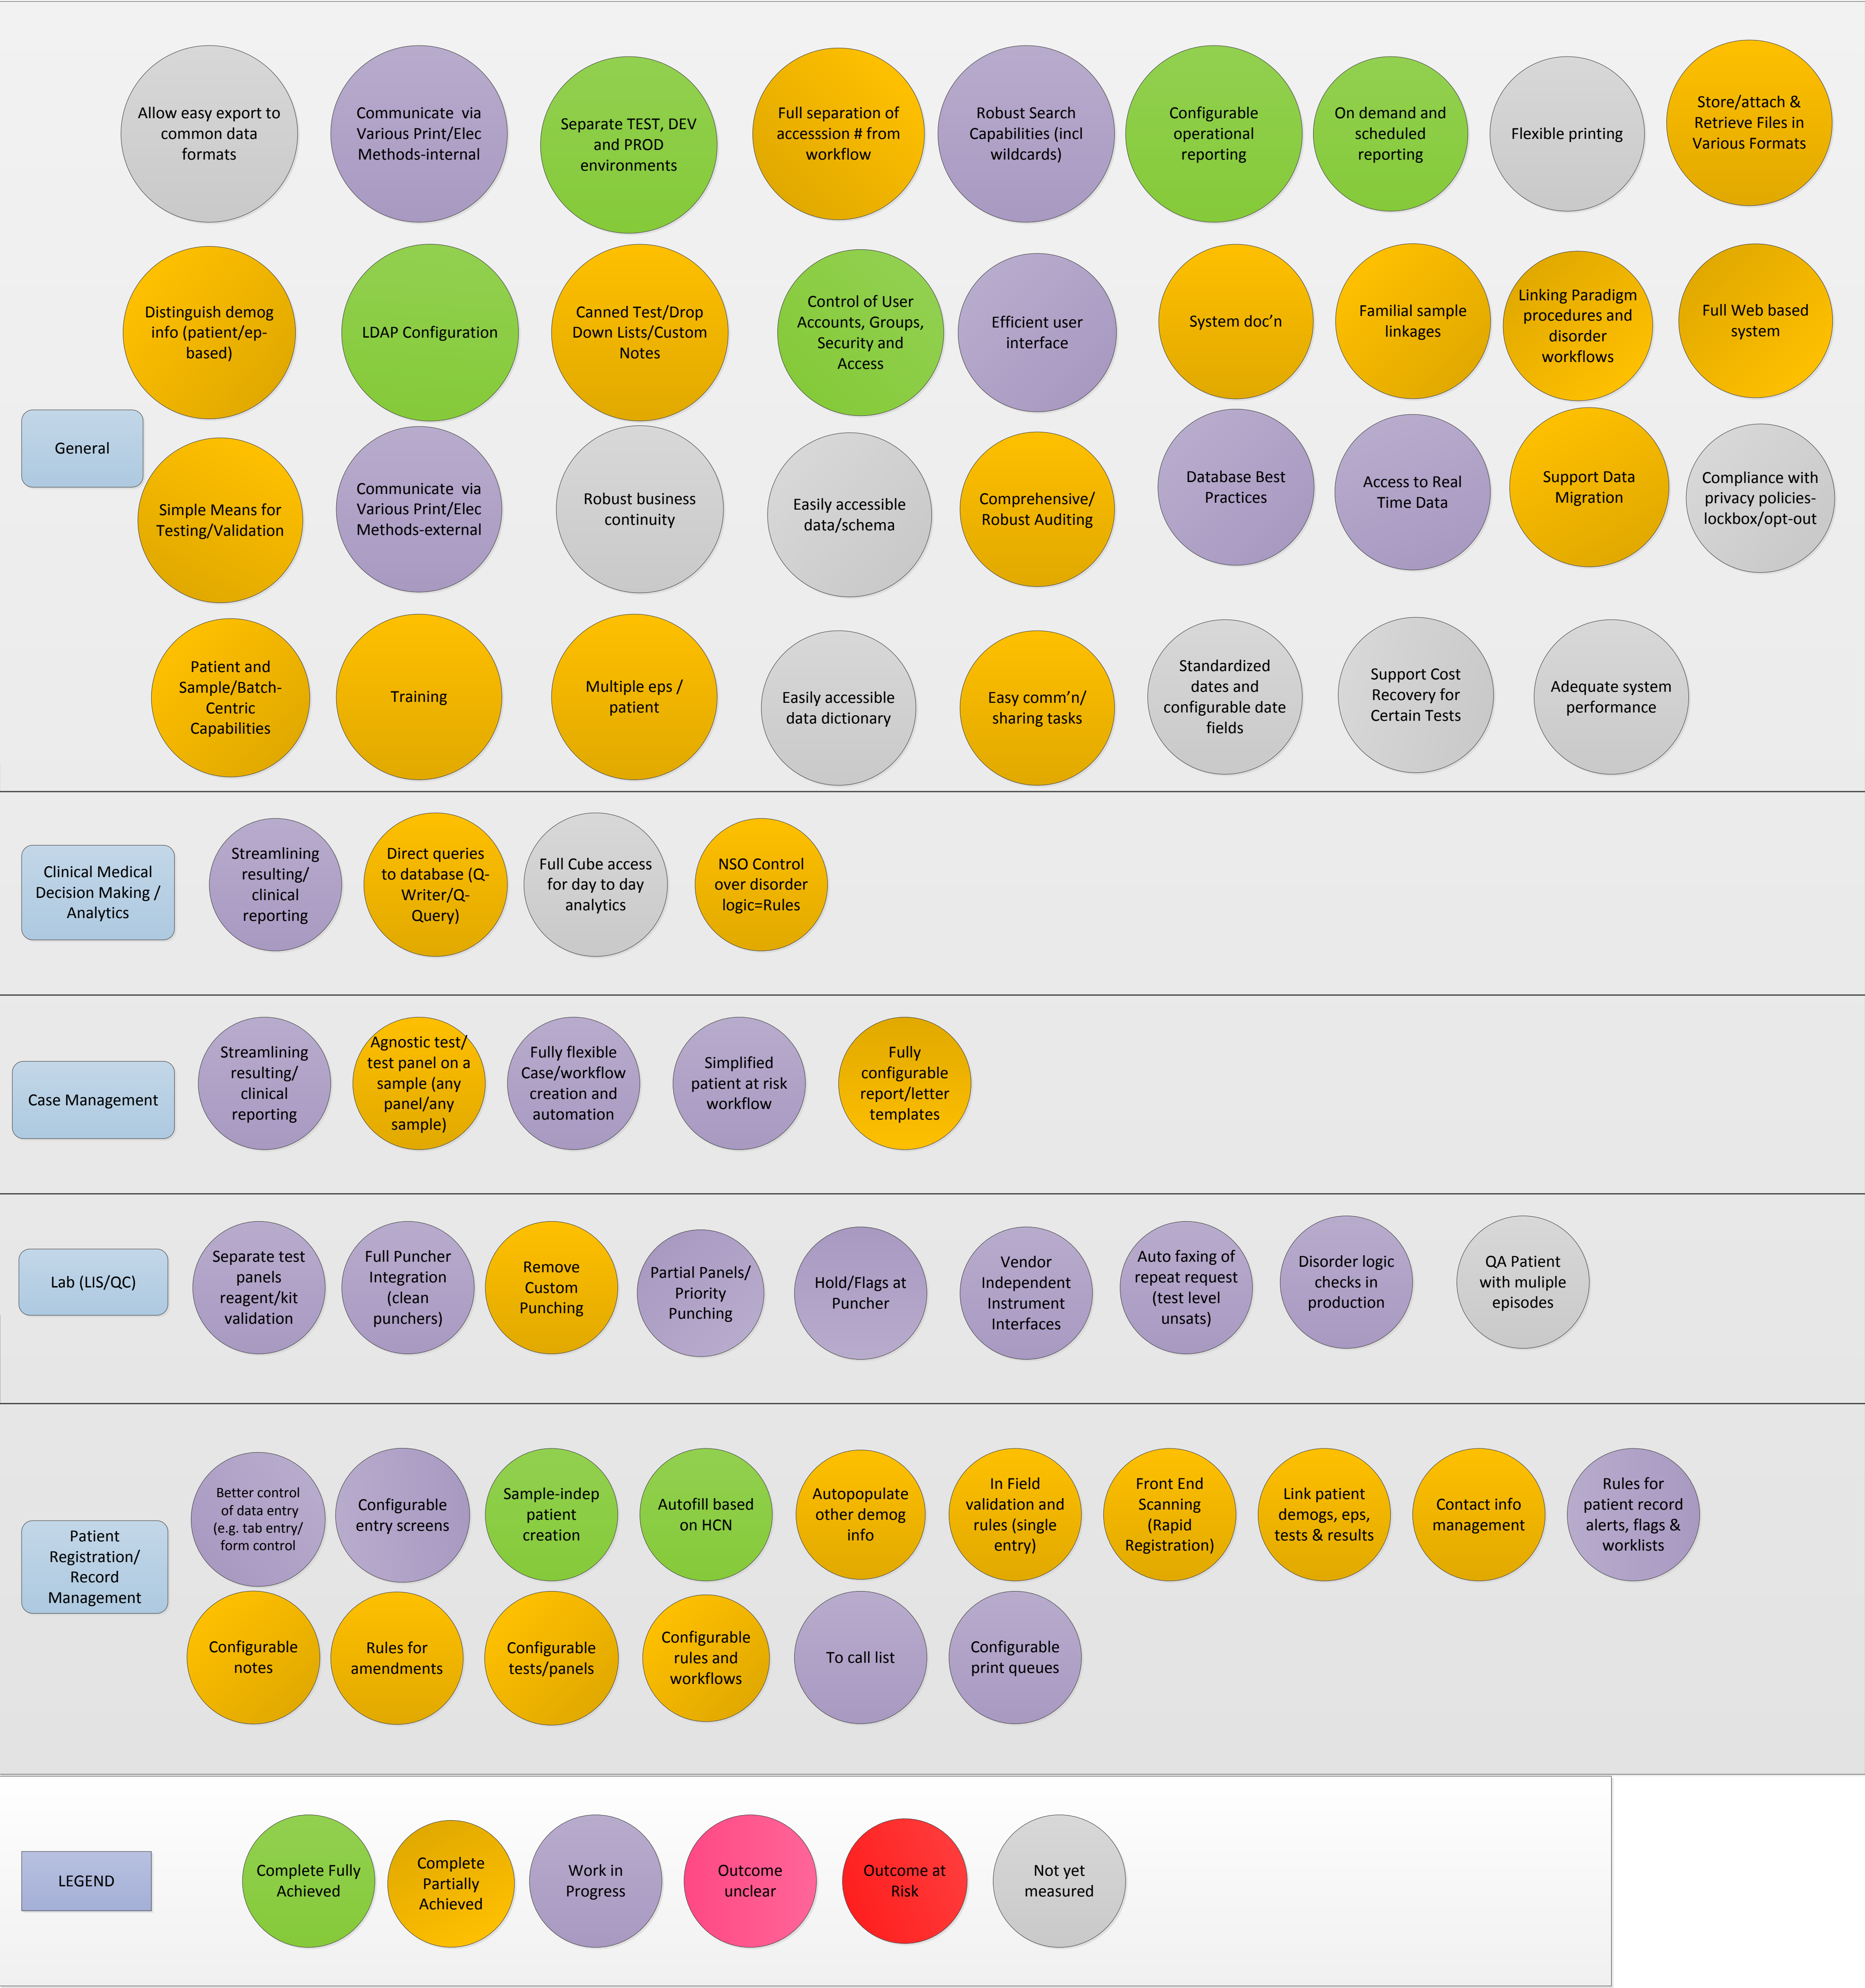

Supplement: s1 [file s1]
